# Supplementary material for: Reactive boride as a multifunctional interface stabilizer for garnet-type solid electrolyte in all-solid-state lithium batteries
Source: Royal Society of Chemistry journal article supplement (doi:10.1039/d3nr02271d), 2023-01-01
Supplement: d3nr02271d1.pdf [file d3nr02271d1.pdf]

ARTICLE

**Supporting Information**

**Reactive Boride as Multifunctional Interface Stabilizer for Garnet-Type Solid Electrolyte in All-Solid-State Lithium Batteries**

Mingzhe Chen,<sup>\*a</sup> Jing Zhang,<sup>b</sup> Jiliang Zhang,<sup>c</sup> Binkai Yu,<sup>a</sup> Limin Zhou,<sup>a</sup> Yao Xiao,<sup>d</sup> Xu Gao,<sup>e</sup> Jin Xiao,<sup>\*f</sup> Chunsheng Li,<sup>\*g</sup> Yan Sun,<sup>\*h</sup> Huakun Liu,<sup>i</sup> Shixue Dou,<sup>i</sup> and Shulei Chou<sup>\*d</sup>

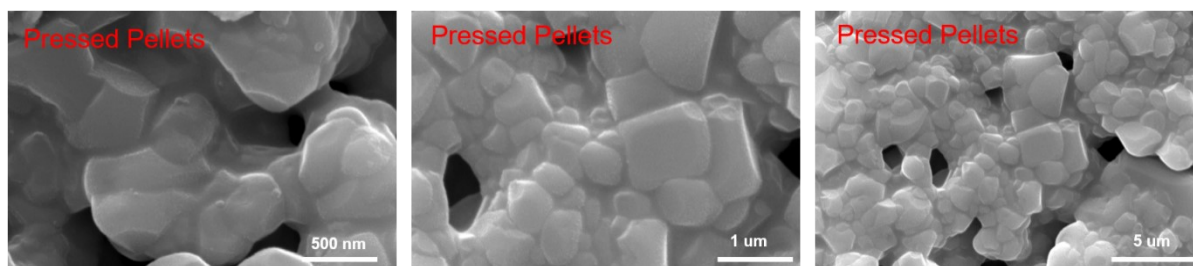

Fig.S1 SEM images of the surface of as-prepared LLZTO pellets.

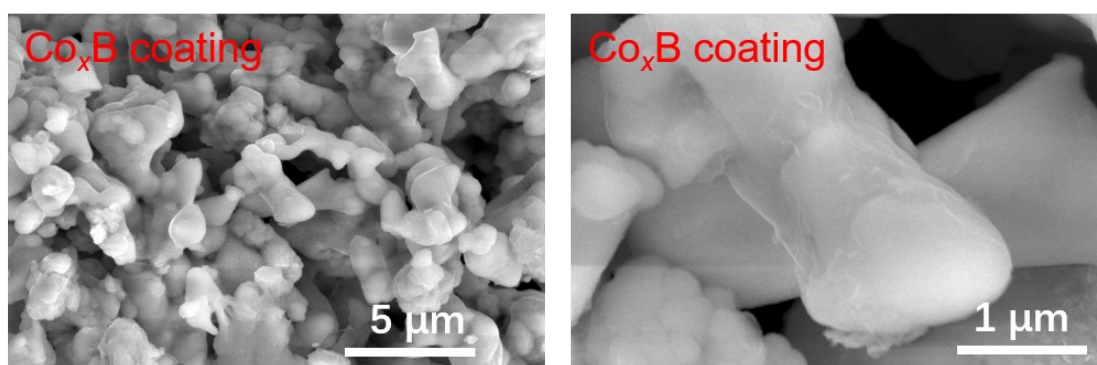

Fig.S2 SEM images of the surface of the Co<sub>x</sub>B coated LLZTO particles with enlarged magnifications.

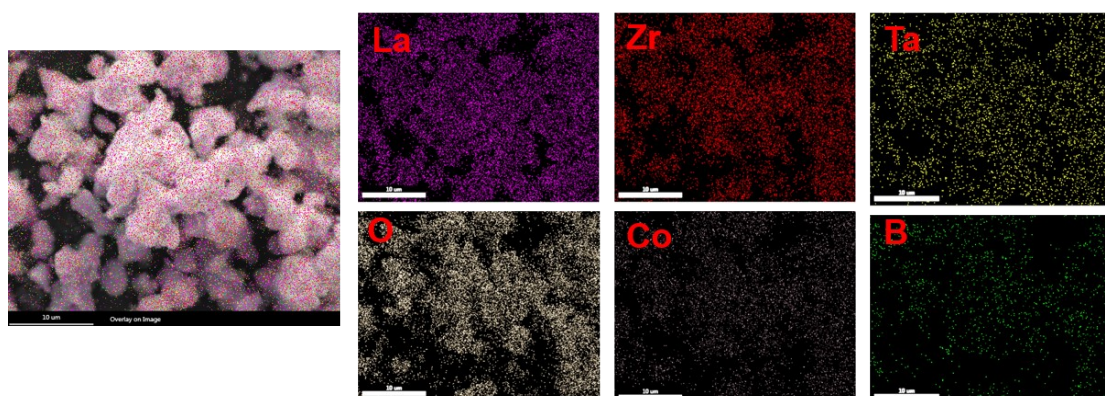

Fig. S3 SEM-EDS mapping results of Co<sub>x</sub>B coated LLZTO particle.

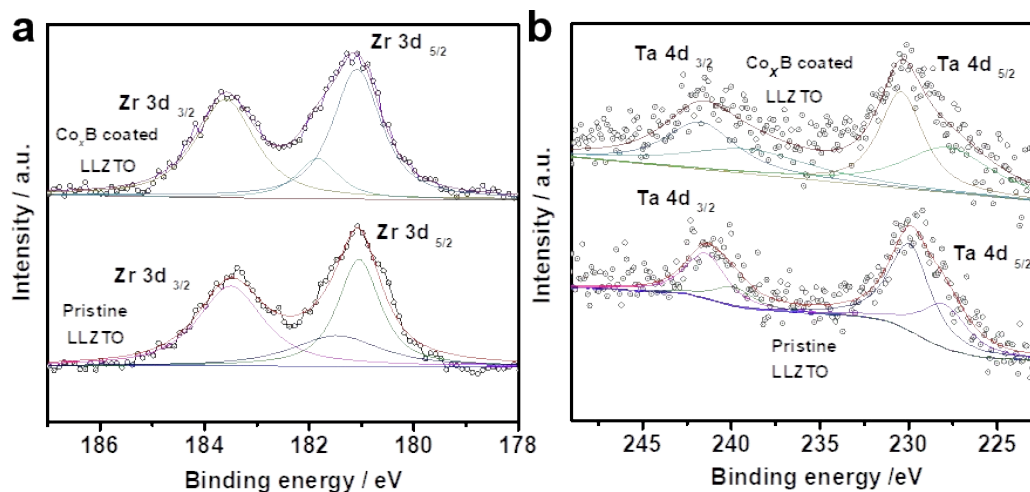

Fig. S4 The XPS spectra of (a) Zr 3d and (b) Ta 4d of both pristine LLZTO and Co<sub>x</sub>B coated LLZTO.

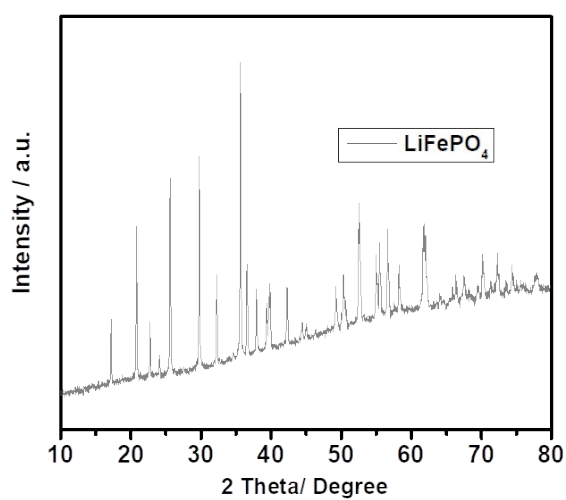

Fig. S5 The XRD patterns of the purchased carbon-coated LiFePO<sub>4</sub> cathode material.

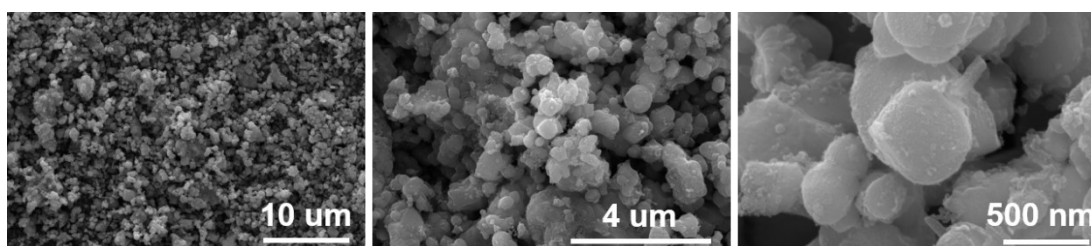

Fig. S6 The SEM images of purchased LiFePO<sub>4</sub>.

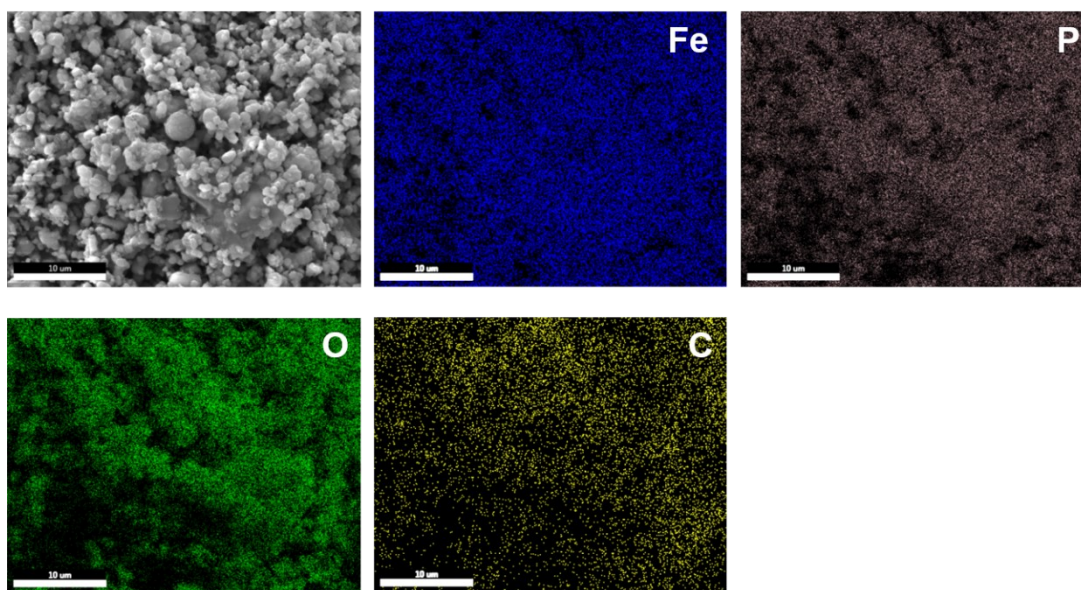

**Fig. S7** The SEM-EDS mapping results of Fe, P, O and C in the purchased  $\text{LiFePO}_4$  cathode material.

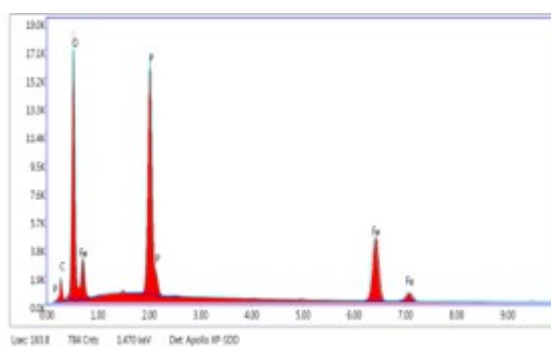

**Fig. S8** The point EDS result of the purchased  $\text{LiFePO}_4$  cathode material.

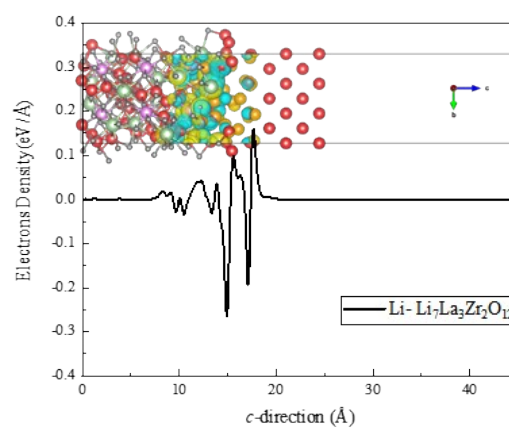

**Fig. S9** The charge density difference plot of isosurface of Li|LLZTO interface.



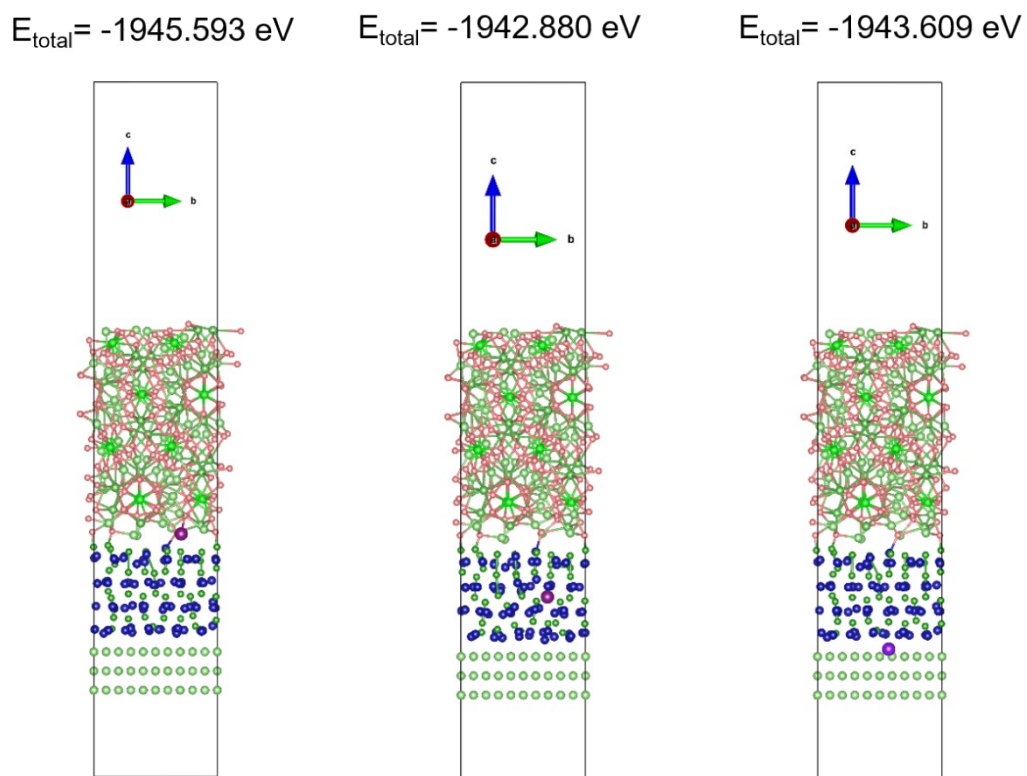

Fig. S10 The total energies of different status of Li ion in the Li|Co<sub>2</sub>B|LLZTO interfaces.

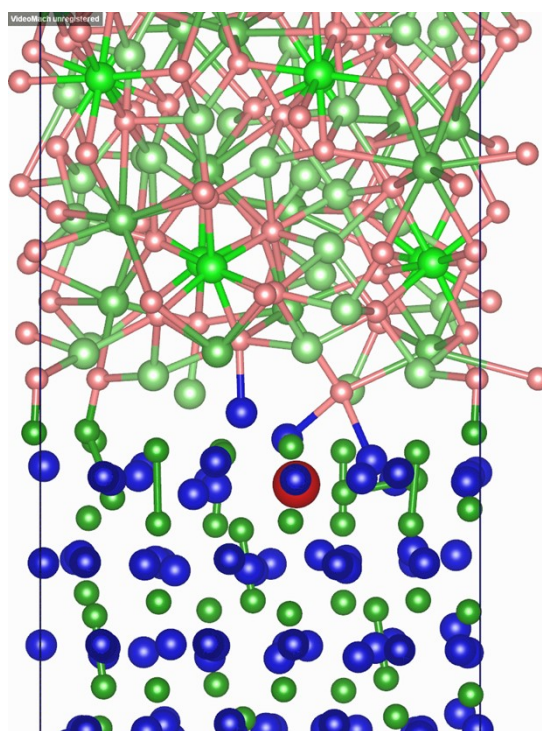

Fig. S11 The animation of the overall Li ion transportation through the Li|Co<sub>x</sub>B|LLZTO interfaces.

**Table S1** The detailed refined results of  $\text{Li}_{6.4}\text{La}_3\text{Zr}_{1.4}\text{Ta}_{0.6}\text{O}_{12}$  powder sample using GSAS-II software.

|     | x         | y         | z          | fraction | multi | Uiso    |
|-----|-----------|-----------|------------|----------|-------|---------|
| Li1 | 0.6500(0) | 0.1790(0) | 0.3773(9)  | 0.2930   | 96    | 0.02459 |
| Li2 | 0.2500(0) | 0.3750(0) | 0.0000(0)  | 0.9600   | 24    | 0.01562 |
| La  | 0.2500(0) | 0.1250(0) | 0.0000(0)  | 1.0000   | 24    | 0.02835 |
| Zr  | 0.0000(0) | 0.0000(0) | 0.0000(0)  | 0.7000   | 16    | 0.02478 |
| Ta  | 0.0000(0) | 0.0000(0) | 0.0000(0)  | 0.3000   | 16    | 0.03074 |
| O   | 0.0538(0) | 0.1483(0) | -0.0048(4) | 1.0000   | 96    | 0.07340 |

**Table S2** The pellet density and chemical composition of pristine LLZTO and Co<sub>x</sub>B coated LLZTO by ICP-OES.

|                                | Relative density | ICP-OES results |      |      |      |
|--------------------------------|------------------|-----------------|------|------|------|
|                                |                  | Li              | La   | Zr   | Ta   |
| Pristine LLZTO                 | 92.44 %          | 6.36            | 3.01 | 1.39 | 0.59 |
| Co <sub>x</sub> B-coated LLZTO | 93.15 %          | 6.35            | 3.02 | 1.39 | 0.59 |

**Table S3** The heterogenous junction energy of each component in Co<sub>2</sub>B/LLZTO, Li/Co<sub>2</sub>B and Li/LLZTO.

| Co <sub>2</sub> B/LLZTO-B  | Co <sub>2</sub> B | LLZTO        | Formation (eV) | Area (Å <sup>2</sup> ) | Specific Formation energy (eV Å <sup>-2</sup> ) |
|----------------------------|-------------------|--------------|----------------|------------------------|-------------------------------------------------|
| -1872.766 eV               | -552.227 eV       | -1309.896 eV | -10.64332      | 119.076                | -0.08938                                        |
| Co <sub>2</sub> B/LLZTO-Co | Co <sub>2</sub> B | LLZTO        | Formation (eV) | Area (Å <sup>2</sup> ) | Specific Formation energy (eV Å <sup>-2</sup> ) |
| -1865.461 eV               | -546.888 eV       | -1309.896 eV | -8.67724       | 119.076                | -0.07287                                        |
| Li-Co <sub>2</sub> B-B     | Co <sub>2</sub> B | Li           | Formation (eV) | Area (Å <sup>2</sup> ) | Specific Formation energy (eV Å <sup>-2</sup> ) |
| -135.862 eV                | -112.475 eV       | -21.620 eV   | -1.7672        | 23.4589                | -0.07533                                        |
| Li-Co <sub>2</sub> B-Co    | Co <sub>2</sub> B | Li           | Formation (eV) | Area (Å <sup>2</sup> ) | Specific Formation energy (eV Å <sup>-2</sup> ) |
| -136.315 eV                | -111.384 eV       | -21.624 eV   | -3.3078        | 23.4589                | -0.14100                                        |
| Li-LLZTO                   | LLZTO             | Li           | Formation (eV) | Area (Å <sup>2</sup> ) | Specific Formation energy (eV Å <sup>-2</sup> ) |
| -1156.360 eV               | -1020.790 eV      | -127.575 eV  | -7.99525       | 122.238                | -0.06540                                        |

Note: Co<sub>2</sub>B/LLZTO-B means the interface main contacting atom in Co<sub>2</sub>B is B atom, Co<sub>2</sub>B/LLZTO-Co means the interface main contacting atom in Co<sub>2</sub>B is Co atom.
